# Supplementary material for: Integrating phylogenomic and morphological evidence to solve the taxonomy of Phoebe legendrei (Lauraceae) and closely related species
Source: Research Square preprint supplement (doi:10.21203/rs.3.rs-7442734/v1), 2025-09-24
Supplement: Supplementary file 1 [file 0ad04bdc7f8012ae4a04597d.xlsx]

## Sheet: Sheet1
Characteristics	P. calcarea MZ433404	P. crassipedicella NC_058726	P. jingxiensis 5	P. kwangsiensis 3007	P. lanceolata 2542	P. legendrei 94	P. legendrei 143	P. neurantha MH394352	P. puwenensis 2643	P. tavoyana NC058829	P. yaiensis 1
Total cp genome size (bp)	152851	152784	152786	152785	152808	152791	152744	152782	152793	152814	152788
Length of LSC (bp)	93761	93729	93732	93730	93765	93731	93689	93730	93720	93769	93740
Length of SSC (bp)	18904	18905	18904	18905	18897	18922	18905	18904	18887	18899	18910
Length of IR (bp)	20093	20075	20075	20075	20073	20069	20075	20074	20093	20073	20069
Total GC content (%)	39.2	39.2	39.2	39.2	39.2	39.2	39.2	39.2	39.1	39.2	39.2
GC content of LSC (%)	38	38	38	38	38	38	38	38	37.9	37.9	38
GC content of SSC (%)	34	33.9	33.9	33.9	34	33.9	33.9	33.9	33.8	34	33.9
GC content of IR (%)	44.4	44.4	44.4	44.4	44.4	44.4	44.4	44.4	44.4	44.4	44.5
Number of genes (unique)	126 (113)	126 (113)	126 (113)	126 (113)	126 (113)	126 (113)	126 (113)	126 (113)	126 (113)	126 (113)	126 (113)
Protein genes (unique)	82 (79)	82 (79)	82 (79)	82 (79)	82 (79)	82 (79)	82 (79)	82 (79)	82 (79)	82 (79)	82 (79)
tRNA genes (unique)	36 (29)	36 (29)	36 (29)	36 (29)	36 (29)	36 (29)	36 (29)	36 (29)	36 (29)	36 (29)	36 (29)
rRNA genes (unique)	8 (4)	8 (4)	8 (4)	8 (4)	8 (4)	8 (4)	8 (4)	8 (4)	8 (4)	8 (4)	8 (4)
