# Supplementary material for: Integrating phylogenomic and morphological evidence to solve the taxonomy of Phoebe legendrei (Lauraceae) and closely related species
Source: Research Square preprint supplement (doi:10.21203/rs.3.rs-7442734/v1), 2025-09-24
Supplement: Supplementary file 2 [file 792e8c1f03476551d0f1fbf2.xlsx]

## Sheet: Sheet1
Character	P. legendrei (91, 92, 93, 94)	P. legendrei (143, 144, 145, 147)	P. hui	P. neurantha	P. jingxiensis	P. crassipedicella	P. kwangsiensis
Branchlet	densely hairy at first, later glabrescent	sparsely pubescent, later glabrate	slender; young branchlets angular; densely hairy at first, later glabrescent	initially sparsely pubescent or densely villous, later glabrate	glabrous, with lenticels	young branchlets angular; glabrous	pubescent
Leaf shape	elliptic or elliptic-lanceolate	lanceolate, oblanceolate, elliptic or obovate	elliptic, elliptic-lanceolate or elliptic-oblanceolate	narrowly lanceolate, lanceolate or oblanceolate	elliptic or elliptic-lanceolate	obovate or oblanceolate	oblanceolate or elliptic-oblanceolate
Leaf size (cm)	5.2–12.8 (13–14) × 1.3–3.8	7–12.9 × 2–3.6	5–8 (10) × 1.5–3	8–16 × 1.5–4 (4–5)	8–16 × 2.3–4.7	8–14 × 2.5–3.5	9–19 (21) × 2–4
Leaf pubescence	Adaxially glabrous; abaxially sparsely hairy when young, later glabrous	adaxially glabrous; abaxially glabrate or pubescent along veins	adaxially glabrous or puberulent along midrib; abaxially densely gray-white appressed pubescent	adaxially glabrous or hairy when young; abaxially sometimes glaucous, initially pubescent, later gradually glabrate	glabrous on both surfaces	adaxially glabrous; abaxially puberulent	adaxially glabrous or hairy along midrib; abaxially gray-brown pubescent
Midrib	raised on both surfaces	raised on both surfaces	adaxially impressed, abaxially elevated	adaxially impressed, abaxially elevated	-	adaxially impressed in the lower leaf blade and raised in the upper， abaxially raised throughout	adaxially impressed, abaxially elevated
Number of lateral veins	5–8 pairs	7–8(12) pairs	10–12 pairs, fine	8–12 pairs	4–10 pairs	9 pairs, fine	10–13 pairs
Petiole pubescence	pubescent, later glabrate	pubescent, later glabrate	hairy and slender	pubescent or glabrate	glabrous	glabrous or puberulent	hairy
Petiole length (cm)	0.6–1.7	0.8–1.6	0.6–1.6	0.7–1.5	0.5–1.8	0.5–1.5	0.6–1.5
Perianth lobes shape (mm)	outer lobes slightly shorter, outer lobes ovate-triangular, inner lobes ovate-oblong	subequal, ovate-oblong	ovate	outer lobes slightly shorter, ovate-oblong	subequal, ovate	subequal, ovate	ovate-triangular
Perianth lobes pubescence	densely villous on both surfaces	densely gray-white villous on both surfaces	densely gray-white villous on both surfaces	hairy on both surfaces	glabrous outside, densely gray-white villous inside	glabrous or puberulent outside, hairy inside	glabrous or puberulent outside, canescent villous inside
Inflorescences length (cm)	3.5–9 (10)	4–11	4–8	4–10 (12)	5–12.8	-	13–18
Infructescence length (cm)	5.4–11.5 (12)	4.2–11 (12)	-	-	-	8–9	-
Fruit shape	broad-ovoid or ellipsoidal, apex usually distinctly truncate	ovoid	ellipsoid	ovoid	ovoid	ovoid	ovoid
Fruit size (cm)	0.9–1.2×0.8–1	0.8–1.2×0.6–1	1.1–1.4×0.6–0.99	1×0.7	1.1–1.4×0.8–0.9	1×0.6	-
Persistent perianth lobes	usually clasping base of fruit	lax, apex sometimes extrorse	clasping base of fruit	lax, apex sometimes extrorse	clasping base of fruit	clasping base of fruit	clasping base of fruit
Fruiting pedicel	distinctly thickened	distinctly thickened	not enlarged	not enlarged or slightly thickened	not enlarged	thickened	not enlarged
Fruiting pedicel length (cm)	0.22–0.63	0.51–0.96	-	-	0.6–1.5	-	-
